# Supplementary material
Source: PubMed Central journal article supplement (PMC4159384)
Supplement: NIHMS617591-supplement-01.pdf [file NIHMS617591-supplement-01.pdf]

**Table S1. Subthreshold Symptoms of Psychosis in Children Aged 8 - 10 Years Old With Chromosome 22q11.2 Deletion Syndrome (22q11DS), n=38**

| Variable        | Description                                  | Mean | Median | Range   | Subthreshold/<br>Psychotic (%) |
|-----------------|----------------------------------------------|------|--------|---------|--------------------------------|
| <b>P1</b>       | Unusual Thought Content/<br>Delusional Ideas | 1.0  | 0      | 0 - 5   | 18                             |
| <b>P2</b>       | Suspiciousness/ Persecutory Ideas            | 1.0  | 0      | 0 - 5   | 18                             |
| <b>P3</b>       | Grandiosity                                  | 0.3  | 0      | 0 - 5   | 3                              |
| <b>P4</b>       | Perceptual Abnormalities/<br>Hallucinations  | 0.9  | 0      | 0 - 5   | 18                             |
| <b>P5</b>       | Disorganized Communication                   | 1.2  | 1      | 0 - 4   | 18                             |
| <b>N1</b>       | Social Anhedonia                             | 1.2  | 1      | 0 - 4   | 16                             |
| <b>N2</b>       | Avolition                                    | 1.9  | 2      | 0 - 5   | 39                             |
| <b>N3</b>       | Expression of Emotions                       | 0.3  | 0      | 0 - 4   | 3                              |
| <b>N4</b>       | Experience of Emotions and Self              | 0.1  | 0      | 0 - 2   | 0                              |
| <b>N5</b>       | Ideational Richness                          | 1.7  | 1      | 0 - 5   | 39                             |
| <b>N6</b>       | Occupational Functioning                     | 1.3  | 1      | 0 - 4   | 24                             |
| <b>D1</b>       | Odd Behavior or Appearance                   | 0.8  | 0      | 0 - 5   | 11                             |
| <b>D2</b>       | Bizarre Thinking                             | 0.4  | 0      | 0 - 3   | 3                              |
| <b>D3</b>       | Trouble with Focus and Attention             | 2.6  | 3      | 0 - 5   | 58                             |
| <b>D4</b>       | Personal Hygiene                             | 0.8  | 0      | 0 - 4   | 11                             |
| <b>G1</b>       | Sleep Disturbances                           | 1.0  | 0      | 0 - 5   | 16                             |
| <b>G2</b>       | Dysphoric Mood                               | 1.1  | 0      | 0 - 4   | 18                             |
| <b>G3</b>       | Motor Disturbances                           | 0.4  | 0      | 0 - 3   | 3                              |
| <b>G4</b>       | Impaired Tolerance to Normal Stress          | 1.5  | 1.5    | 0 - 5   | 29                             |
| <b>Factor 1</b> | Positive                                     | 0.6  | 0.2    | 0 - 3.3 | 29                             |
| <b>Factor 2</b> | Negative                                     | 1.3  | 1.2    | 0 - 3.7 | 74                             |
| <b>Factor 3</b> | Disorganized                                 | 1.0  | 0.8    | 0 - 3.3 | 42                             |

Note: Descriptive statistics for consensus Scale of Prodromal Symptoms (SOPS) subscales scores for the subgroup of participants aged 8 – 10 years old are shown with percentage of participants who scored in the subthreshold or psychotic range (rating  $\geq 3$ ). Composite factor scores are also described with percentages representing proportion of participants reaching a subthreshold level in any subscale of which the factor is comprised.

**Table S2. Unidimensional, 2-, 3-, and 4-Factor Exploratory Solutions of the Scale of Prodromal Symptoms (SOPS) (With Oblimin Rotation)**

| Scale | Uni         | 2-Factor    |             | 3-Factor    |             |             | 4-Factor    |             |             |             |
|-------|-------------|-------------|-------------|-------------|-------------|-------------|-------------|-------------|-------------|-------------|
|       |             | F1          | F2          | F1          | F2          | F3          | F1          | F2          | F3          | F4          |
| P1    | <b>0.74</b> | <b>0.88</b> |             | <b>0.83</b> |             |             | <b>0.90</b> |             |             |             |
| P2    | <b>0.76</b> | <b>0.59</b> | 0.25        | <b>0.55</b> | 0.29        |             | <b>0.57</b> | 0.26        |             |             |
| P3    | <b>0.60</b> | <b>0.64</b> |             | <b>0.43</b> |             | 0.33        | <b>0.54</b> |             |             |             |
| P4    | <b>0.64</b> | <b>0.71</b> |             | <b>0.81</b> |             |             | <b>0.72</b> |             |             |             |
| P5    | <b>0.58</b> | <b>0.43</b> |             |             |             | <b>0.47</b> |             |             | <b>0.43</b> |             |
| N1    | <b>0.60</b> |             | <b>0.62</b> |             | <b>0.62</b> |             |             | <b>0.53</b> |             |             |
| N2    | <b>0.70</b> |             | <b>0.82</b> |             | <b>0.81</b> |             |             | <b>0.78</b> |             |             |
| N3    | <b>0.63</b> | 0.31        | <b>0.37</b> | 0.30        | <b>0.39</b> |             |             |             |             | <b>0.85</b> |
| N4    | <b>0.38</b> | <b>0.38</b> |             | <b>0.39</b> |             |             | 0.28        |             |             | <b>0.28</b> |
| N5    | <b>0.49</b> | <b>0.38</b> |             |             |             | <b>0.34</b> |             |             | <b>0.36</b> |             |
| N6    | <b>0.71</b> |             | <b>0.78</b> |             | <b>0.78</b> |             |             | <b>0.68</b> |             |             |
| D1    | <b>0.67</b> | <b>0.57</b> |             | 0.28        |             | <b>0.51</b> | 0.28        |             | <b>0.47</b> |             |
| D2    | <b>0.73</b> | <b>0.88</b> |             | <b>0.66</b> |             | 0.31        | <b>0.64</b> |             | 0.26        |             |
| D3    | <b>0.45</b> |             | <b>0.52</b> |             | <b>0.49</b> |             |             | <b>0.57</b> |             |             |
| D4    | <b>0.61</b> |             | <b>0.63</b> |             | <b>0.62</b> |             |             | <b>0.59</b> |             |             |
| G1    | <b>0.54</b> |             | <b>0.54</b> |             | <b>0.56</b> |             |             | <b>0.52</b> |             |             |
| G2    | <b>0.59</b> |             | <b>0.62</b> |             | <b>0.62</b> |             |             | <b>0.54</b> |             |             |
| G3    | <b>0.38</b> |             | <b>0.26</b> |             |             | <b>0.33</b> |             |             | <b>0.32</b> |             |
| G4    | <b>0.62</b> |             | <b>0.76</b> |             | <b>0.74</b> |             |             | <b>0.73</b> |             |             |

  

| Factor Correlations ( $\phi$ Matrices) |      |      |      |      |      |      |      |      |      |      |
|----------------------------------------|------|------|------|------|------|------|------|------|------|------|
|                                        | F1   | F2   | F3   | F4   | F1   | F2   | F3   | F4   | F1   | F2   |
| F1                                     | 1.00 |      |      |      | 1.00 |      |      |      | 1.00 |      |
| F2                                     | 0.64 | 1.00 |      |      | 0.58 | 1.00 |      |      | 0.50 | 1.00 |
| F3                                     |      |      | 1.00 |      | 0.44 | 0.40 | 1.00 |      | 0.37 | 0.32 |
| F4                                     |      |      |      | 1.00 |      |      |      | 1.00 | 0.43 | 0.40 |

Note: Loadings < 0.25 removed; dominant loadings bolded; due to Heywood case, the 4-factor solution had to be estimated using Bayesian Markov Chain Monte Carlo; all other models estimated using robust maximum likelihood (MLR in Mplus v7.1). D1 = odd behavior or appearance; D2 = bizarre thinking; D3 = trouble with focus and attention; D4 = personal hygiene; F = factor; G1 = sleep disturbances, G2 = dysphoric mood; G3 = motor disturbances; G4 = impaired tolerance to normal stress; N1 = social anhedonia; N2 = avolition; N3 = expression of emotion; N4 = experience of emotion and self; N5 = ideational richness; N6 = occupational functioning; P1 = unusual thought content/delusional ideas; P2 = suspiciousness/persecutory thinking; P3 = grandiosity; P4 = perceptual abnormalities/hallucinations; P5 = disorganized communication; rotation = oblimin; Uni = unidimensional.

**Unidimensional Model:** The fit of the unidimensional model is poor: the comparative fit index (CFI) is 0.76, the standardized root mean residual (SRMR) is 0.081, and the root mean square error of approximation (RMSEA) is 0.104 ( $\pm 0.013$ ) – none of these indices meet convention cutoffs for fit, and a multi-factorial solution is therefore suggested. Nonetheless, the large loadings in the unidimensional model do indicate a strong underlying dimension influencing all factors described below.

**Two-Factor Model:** The two-factor solution is relatively “clean,” with only two cross-loadings. The fit falls just short of acceptable (CFI = 0.89; SRMR = 0.054; RMSEA = 0.076  $\pm$  0.016). A strong inter-factor correlation (0.61) provides further evidence of a strong underlying dimension.

**Three-Factor Model:** The fit of this model is acceptable (CFI = 0.90; SRMR = 0.044; RMSEA = 0.078  $\pm$  0.017).

**Four-Factor Model:** Conventional estimation methods (maximum likelihood [ML] and unweighted least squares) failed due to a Heywood case (a communality greater than 1.0). However, the

Bayesian Markov Chain did converge, so this model is probably interpretable. Unfortunately, well-established fit indices like the ones reported above are not available when Bayesian estimation is used.

ACCEPTED MANUSCRIPT
